# Supplementary material
Source: Springer Nature journal article supplement (https://www.springermedizin.de/resource/supplementary/12933_2009_211_MOESM3_ESM.pdf/9539864)
Supplement: MOESM3 [file 9539864]

(a) Upper gastro-intestinal bleeding (n=138)

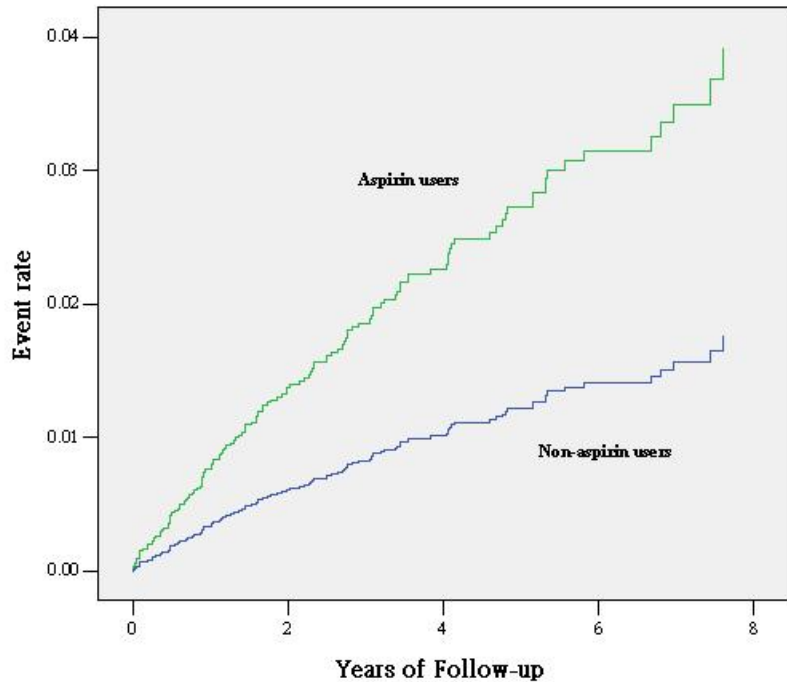

p-value: <0.001

(b) Endoscopically confirmed ulcer bleeding (n=78)

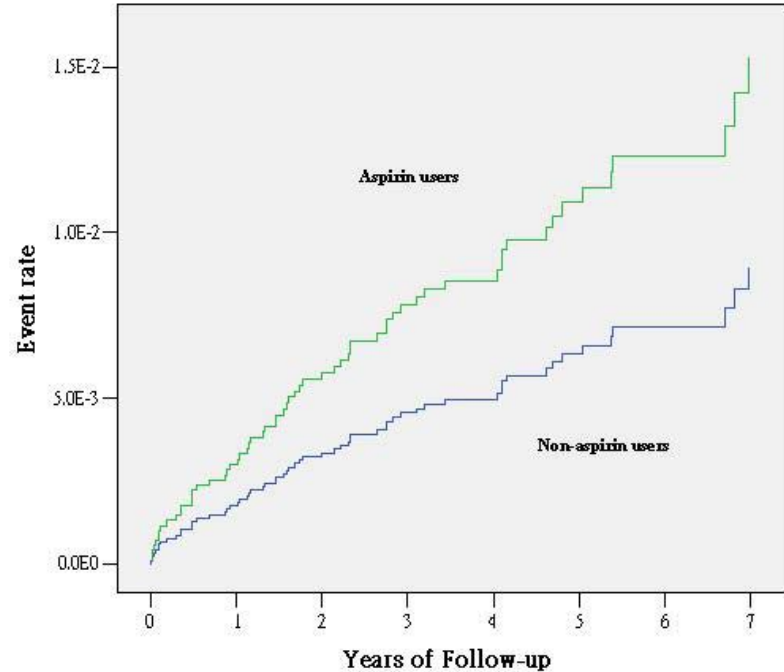

p-value = 0.043
